# Supplementary material for: Nonsense mRNA suppression via nonstop decay
Source: eLife. 2018 Jan 8;7:e33292. doi: 10.7554/eLife.33292 (PMC5777819; doi:10.7554/eLife.33292)
Supplement: Supplementary file 1. — Each table is a separate sheet; reagents available upon request. [file elife-33292-supp1.xlsx]

## Sheet: Oligos
AF#	Sequence	Description
AF-JA-138	TCTTG GGAAGAGGCAGAGGATATG	AF-JA-138/139 make gRNA overlapping Asp25 of pelo-1
AF-JA-139	AAAC CATATCCTCTGCCTCTTCC C	AF-JA-138/139 make gRNA overlapping Asp25 of pelo-1
AF-JA-143	TCTTG TGCGTCTTTCACAAATCCA	AF-JA-143/144 make gRNA overlapping RGF motif in pelo-1
AF-JA-144	AAAC TGGATTTGTGAAAGACGCA C	AF-JA-143/144 make gRNA overlapping RGF motif in pelo-1
AF-JA-147	TTTTCATAGGAAAGCTTTGCAAA	AF-JA-147/150 make 1520bp amplicon over pelo-1 locus
AF-JA-150	GCCAGACGATAGTAAATGTCCCT	AF-JA-147/150 make 1520bp amplicon over pelo-1 locus
AF-JA-152	ACTTCATCTTTTGCAGATTCGTAGTTTTAATGGCGGAAGAGGCAGAGGATAGATCTATTTGTGAAAGACGCATTTATGCAGCATTTAATAGCACATGCAGATGCAA	ultramer to delete region between gRNAs in pelo-1 (pJA60 and pJA61). Creates BglII site.
AF-JA-175	TCTTG ATGGTATAGGAGCACATGG	AF-JA-175/176 make gRNA #1 in skih-2
AF-JA-176	AAAC CCATGTGCTCCTATACCAT C	AF-JA-175/176 make gRNA #1 in skih-2
AF-JA-177	TCTTG TAGCTGCTCACACTTCTGC	AF-JA-177/178 make gRNA #2 in skih-2
AF-JA-178	AAAC GCAGAAGTGTGAGCAGCTA C	AF-JA-177/178 make gRNA #2 in skih-2
AF-JA-179	CGGAACGTTTGTTCCGTTTGGAATGTCTGGAAACTCTGAACTGGCCACCAAAUAAAAGATCTTGCTGGAAAAACTGTTGTTGCTGAGTATGCAATTGCACTTTGTCAAGCAC	donor oligo for deletion between gRNAs at skih-2 locus, introduces BglII site
AF-JA-180	atacgcaaacaccacaaatgacg	AF-JA-180/181 make 1498bp amplicon over skih-2 locus (438bp is HR of AF-JA-179)
AF-JA-181	TTATGTGCTTGACAAAGTGCAATTG	AF-JA-180/181 make 1498bp amplicon over skih-2 locus (438bp is HR of AF-JA-179)
AF-JA-884	ACGCGATTTGATGAACATgtaag	AF-JA-884/885 make 1017bp amplicon overlapping C-terminal deletion of PD4148
AF-JA-885	GCCCATTCATACACAACTTCCAT	AF-JA-884/885 make 1017bp amplicon overlapping C-terminal deletion of PD4148
AF-JA-214	TCTTG ATGCATTCGGTTGCCTCTG	AF-JA-214/215 make gRNA #1 in y54e10a.11 exon 5
AF-JA-215	AAAC CAGAGGCAACCGAATGCAT C	AF-JA-214/215 make gRNA #1 in y54e10a.11 exon 5
AF-JA-216	TCTTG CGAAGATGGTCAAAGAGCT	AF-JA-214/215 make gRNA #2 in y54e10a.11 exon 6
AF-JA-217	AAAC AGCTCTTTGACCATCTTCG C	AF-JA-214/215 make gRNA #2 in y54e10a.11 exon 6
AF-JA-218	tttccagATTGTGGAAATGTCGAACCAATCGATGCACTTTAACACCGCAG AATAAA AGATCT GCTCGGAAGATTGGCTCTGTTCAGTGTGGCTTCGAATTgtcggttttagt	donor oligo for bridge deletion between gRNAs in y54e10a.11. Deletes 1092 nts and inserts BglII site, leaving N-tmerinal 436 AAs
AF-JA-221	ctactctctttaaaggtgcatacc	AF-JA-221/222 make 1891bp amplicon that lacks both BglII and BamHI sites over y54e10a.11 locus
AF-JA-222	aatctagtcagtaaatcgacctac	AF-JA-221/222 make 1891bp amplicon that lacks both BglII and BamHI sites over y54e10a.11 locus
AF-JA-167	TCTTG AATTGGACTTAGAAGTCAG	AF-JA-167/168 make gRNA that cleaves over stop codon of unc-54
AF-JA-168	AAAC CTGACTTCTAAGTCCAATT C	AF-JA-167/168 make gRNA that cleaves over stop codon of unc-54
AF-JA-241	CTGCTGGGATTACACATGGCATGGATGAACTATACAAAGCCTCTGACTTCGACGTCCAATTACTCTTCAACATCCCTACATGCTCTTTCTCCCTGTGCTCCCA	donor oligo for HR over unc-54::gfp stop codon, to convert stop to AatII site and ablate stop codon
AF-JA-796	CTGCTGGGATTACACATGGCATGGATGAACTATACAAAGCCTCTGACTTC GAA GGT CGa GGa TCT TTg TTA ACa TGT GGT GAT GTc GAA GAA AAT CCa GGa Cct GACGTCCAATTACTCTTCAACATCCCTACATGCTCTTTCTCCCTGTGCTCCCA	donor oligo removes unc-54 stop codon and introduces T2A peptide. Flanking homologies as with AF-JA-241 (for unc-54::GFP)
AF-JA-987	agccttggccttgttgagttg	AF-JA-987/988 make 917bp amplicon over e1092, without AflII site.
AF-JA-988	CTCAACAAAAGGATGCCTCC	AF-JA-987/988 make 917bp amplicon over e1092, without AflII site.
AF-JA-260	TCTTG ATAGAAAGATCTTGAATGG	AF-JA-260/261 make gRNA in unc-54(nonstop) 3’UTR
AF-JA-261	AAAC CCATTCAAGATCTTTCTAT C	AF-JA-260/261 make gRNA in unc-54(nonstop) 3’UTR
AF-JA-262	AATAGAATTAATTCGTCAAGAAAAGTCGAAAAAAATTGTGCTCCCTCCCCgCAgCAAGATCTTTCTATCCCAAAATCTACACAATGTTCTGTGTACACTTCTTA	donor oligo with AF-JA-260/261 gRNA. Introduces BbvI site and a frameshift which should cause a stop codon to be encountered prior to poly(A) tail.
AF-JA-822	CATCGGCCGCTGTCATCAGATCGCCATCTCGCGCCCGTGCCTCTGACTTC GTCTCAAAGGGTGAAGAAGATAACATGGCAATTATTAAAG	AF-JA-822/823 are donor bridge ultramers to make unc-54::mCherry. Use with mCherry amplicon.
AF-JA-823	GAGCACAGGGAGAAAGAGCATGTAGGGATGTTGAAGAGTAATTGGACTTA CTTATACAATTCATCCATGCCACCTGTCGAGTGCCGCCCT	AF-JA-822/823 are donor bridge ultramers to make unc-54::mCherry. Use with mCherry amplicon.
AF-JA-989	AACGAATTATTTCACTGTGTGC	AF-JA-989/990 make 550bp amplicon over smg-1(e1228) mab-1 site. +MboII is 40,96,101,313bp if wt, 96,101,353 if e1228
AF-JA-990	GAGAAATAGCTTGAAGTTTTAGCC	AF-JA-989/990 make 550bp amplicon over smg-1(e1228) mab-1 site. +MboII is 40,96,101,313bp if wt, 96,101,353 if e1228
AF-JA-267	ACACGGAGUCGACAUGC	17nt RNA for loading standard. Similar but different from AF-MS-24 in sequence
AF-MS-24	AUGUACACGGAGUCGACCCGCAACGCGA	28 nt RNA oligo for PAGE size selection of ribosome footprints

## Sheet: Strains
Strain Number (PD)	Description	Strain Construction
PD 2859	unc-54(cc2859; unc-54::gfp::stop::nonstop)I	made by CRISPR using dpy-10 as a marker, donor was PCR product (GFP S65C from pPD95_69). LACKS two silent AAG->AAA mutations in unc-54 CDS, but contains a recoded 3'UTR (marked with BglII) without stop codons. JA from 60.27.1.3
PD 2865	unc-54(cc2865; unc-54::gfp::AatII::nonstop)I	made by CRISPR using dpy-10 as coconversion marker in PD 2859 background. Inserts AatII site over stop codon, and has no in-frame stop codons with unc-54::gfp. JA from PD2859-63.19.4.1
PD 2882	unc-54(cc2882; unc-54(e1301)::gfp::stop::nonstop)I	made by CRISPR using dpy-10 as marker in PD2859 background. Contains e1301 mutation conferring ts Unc behavior. JA from PD2859-74.13.2.2
PD 4092	unc-54(cc4092; unc-54::gfp::T2A::nonstop)I	made by CRISPR using dpy-10 as marker in PD2859 background. Has T2A site after GFP and no in-frame stop codons.
PD 2854	skih-2(cc2854)IV	made using CRISPR with dpy-10 as marker, deleted ~1060nt of skih-2, likely via NHEJ. JA from 57.19.16.2
PD 2849	r74.6(cc2849)III	made using CRISPR with dpy-10 as a marker in the PD1074 background. Deletion of exons 3,4,5, partial deletion of exons 2,6. Deletion spanned by inserted BglII site. JA from PD1074-54.1.3.4
PD 2862	y54e10a.11(cc2862)I	made by CRISPR using dpy-10 as coconversion marker, deletes 1092 bp and inserts stop codon. Leaves N-terminus of 436 AAs
PD 2860	skih-2(cc2854)IV; r74.6(cc2849)III	made by crossing using qC1 balancer from PD5760, crossing with PD2854, then with PD2849. Both loci homozygous after following by PCR.
PD 2870	unc-54(cc2865; unc-54::gfp::AatII::nonstop)I; skih-2(cc2854)IV	made by mating PD3562 (source of nT1 GFP) with PD1074, then mating with PD2859 (unc-54::gfp), then with PD2854 (skih-2), then picking green Uncs, then non-green progeny
PD 2884	unc-54(cc2865; unc-54::gfp::AatII::nonstop)I; r74.6(cc2849)III	made by crossing through PD2860 bg, and PD2865
PD 2868	y54e10a.11(cc2862);unc-54(cc2865; unc-54::gfp::AatII::nonstop)I	made by mating PD2862 with ht2 GFP balancer (fromPD 8811), then mating with PD2865 and looking for y54e10a.11 homozygotes, then look for unc-54 homozygotes (by phenotype)
PD 2873	y54e10a.11(cc2862) unc-54(cc2865;unc-54::gfp::AatII::nonstop)I; skih-2(cc2854)IV	made by some combination of matings between PD3562 (source of nT1 GFP), PD2854 (skih-2), PD2869 (y54e10a.11; unc-54(cc2865)) and screening by single worm PCR
PD 2886	unc-54(cc2865; unc-54::gfp::AatII::nonstop)I; r74.6(cc2849)III; skih-2(cc2854)IV	made by crossing through PD2860 bg, and PD2865. Extremely slow growing
PD 2888	unc-54(cc2888; unc-54::gfp::AatII::nonsto::Stop(BbvI)::p)I	made by CRISPR using dpy-10 as marker in PD2865/1074 heterozygote, then homozygoused from Rol F1. JA from PD2865-72.24.22.2
PD 4141	unc-54(cc4092; unc-54::gfp::T2A::nonstop)I; skih-2(cc4141; G416D)IV	Obtained by mutagenesis of PD4092. JAA from 4092-5.1. GGT>GAT
PD 4142	unc-54(cc4092; unc-54::gfp::T2A::nonstop)I; skih-2(cc4142; G627E)IV	Obtained by mutagenesis of PD4092. JAA from 4092-4.1. GGA>GAA
PD 4143	unc-54(cc4092; unc-54::gfp::T2A::nonstop)I; skih-2(cc4143; 15SS5)IV	Obtained by mutagenesis of PD4092. JAA from 4092-6.1. Has a mutation of 5'SS of intron 15 (GT>AT).
PD 4144	unc-54(cc4092; unc-54::gfp::T2A::nonstop)I; skih-2(cc4144; G367E)IV	Obtained by mutagenesis of PD4092. JAA from 4092-7.1. GGA>GAA
PD 4145	unc-54(cc4092; unc-54::gfp::T2A::nonstop)I; ttc-37(cc4145; Q383*)V	Obtained by mutagenesis of PD4092. JAA from 4092-8.2. CAG>TAG
PD 4146	unc-54(cc4092; unc-54::gfp::T2A::nonstop)I; skih-2(cc4146; Q162*)IV	Obtained by mutagenesis of PD4092. JAA from 4092-9.2. CAA>TAA
PD 4147	unc-54(cc4092; unc-54::gfp::T2A::nonstop)I; skih-2(cc4147; 5SS5)IV	Obtained by mutagenesis of PD4092. JAA from 4092-10.2. Has a mutation of 5'SS of intron 5 (GT>GA).
PD 4148	unc-54(cc4092; unc-54::gfp::T2A::nonstop)I; skih-2(cc4148; Del476)IV	Obtained by mutagenesis of PD4092. JAA from 4092-11.1. Has C-terminal 476bp deletion.
PD 4149	unc-54(cc4092; unc-54::gfp::T2A::nonstop)I; skih-2(cc4149; 13SS5)IV	Obtained by mutagenesis of PD4092. JAA from 4092-13.2. Has a mutation of 5'SS of intron 13 (GT>AT).
PD 4150	unc-54(cc4092; unc-54::gfp::T2A::nonstop)I; skih-2(cc4150; S1132L)IV	Obtained by mutagenesis of PD4092. JAA from 4092-14.2. TCA>TTA
PD 4151	unc-54(cc4092; unc-54::gfp::T2A::nonstop)I; skih-2(cc4151; L1002fs)IV	Obtained by mutagenesis of PD4092. JAA from 4092-15.1. Indel over Leu 1002 changing ELG...>ETWIILSES*
PD 4152	unc-54(cc4092; unc-54::gfp::T2A::nonstop)I; ttc-37(cc4152; 3SS3)V	Obtained by mutagenesis of PD4092. JAA from 4092-16.1. Has a mutation of 3'SS of intron 3 (AG>AA).
PD 4153	unc-54(cc4092; unc-54::gfp::T2A::nonstop)I; skih-2(cc4153; 10SS5)IV	Obtained by mutagenesis of PD4092. JAA from 4092-17.1. Has a mutation of 5'SS of intron 10 (GT>TT).
PD 4154	unc-54(cc4092; unc-54::gfp::T2A::nonstop)I; ttc-37(cc4154; D564G)V	Obtained by mutagenesis of PD4092. JAA from 4092-18.1. GAT>GGT
PD 4155	unc-54(cc4092; unc-54::gfp::T2A::nonstop)I; skih-2(cc4155; T381P)IV	Obtained by mutagenesis of PD4092. JAA from 4092-20.1. ACA>CCA
PD 4156	unc-54(cc4092; unc-54::gfp::T2A::nonstop)I; skih-2(cc4156; R626*)IV	Obtained by mutagenesis of PD4092. JAA from 4092-21.1. AGA>TGA
PD 4157	unc-54(cc4092; unc-54::gfp::T2A::nonstop)I; skih-2(cc4157; R464*)IV	Obtained by mutagenesis of PD4092. JAA from 4092-22.1. CGA>TGA
PD 4206	unc-54(cc4092; unc-54::gfp::T2A::nonstop)I; skih-2(cc2854)IV	Made by crossing PD1099 (VC2010/PD1074 males) with PD3562 (nT1). Resulting pharyngeal GFP males mated with PD4092. Non-Unc males with pharyngeal GFP mated to PD2854. Pharyngeal GFP hermaphrodites singled, isolated Unc, then pharyngeal GFP minus. Confirm skih-2 by PCR
PD 4226	unc-54(cc4092; unc-54::gfp::T2A::nonstop)I; r74.6(cc2849)III	Made using qC1 balancer (from PD2840, PD5760) with PD2849, 4092.
PD 4233	unc-54(cc4092; unc-54::gfp::T2A::nonstop)I; r74.6(cc2849)III; skih-2(cc2854)IV	Mated PD2854 (skih-2) males (later frozen as PD4232) with PD4226. Singled animals until found homozygote for ski, pelo, and unc-54. JAA from 1.4.X.12.1
PD 2071	unc-54(e1092) smg-1(e1228)I	Source of e1092, e1228 alleles.
PD 1748	unc-54(e1092)I; skih-2(cc2854)IV; r74.6(cc2849)III	Made by mating skih-2(cc2854) males with PD2860, mating those males with PD2071 (smg-1(e1228),unc-54(e1092)). Took cross progeny to 16C and homozygoused skih-2(cc2854) and r74.6(cc2849) mutations. Then homozygoused smg-1(+), then unc-54(e1092)
PD 1749	unc-54(e1092)I smg-1(e1228)I; skih-2(cc2854)IV; r74.6(cc2849)III	Made by mating skih-2(cc2854) males with PD2860, mating those males with PD2071 (smg-1(e1228),unc-54(e1092)). Took cross progeny to 16C and homozygoused skih-2(cc2854) and r74.6(cc2849) mutations. Then homozygoused smg-1(e1228), then unc-54(e1092)
PD 1767	smg-1(e1228)I; skih-2(cc2854)IV; r74.6(cc2849)III	Made by mating skih-2(cc2854) males with PD2860, mating those males with PD2071 (smg-1(e1228),unc-54(e1092)). Took cross progeny to 16C and homozygoused skih-2(cc2854) and r74.6(cc2849) mutations. Then homozygoused smg-1(e1228), then unc-54(+). JAA from B2.2.2.23.8.3
PD 1768	skih-2(cc2854)IV; r74.6(cc2849)III	Made by mating skih-2(cc2854) males with PD2860, mating those males with PD2071 (smg-1(e1228),unc-54(e1092)). Took cross progeny to 16C and homozygoused skih-2(cc2854) and r74.6(cc2849) mutations. Then homozygoused smg-1(+), then unc-54(+). JAA from B2.2.2.12.10.2.1/2/3/4/5/7/8/11
PD 4112	unc-54(cc4112;unc-54::mCherry)/unc-54(cc4106;unc-54::GFP)I	Source of unc-54::gfp, unc-54::mCherry males. Obtained by CRISPRing using dpy-10 as a marker in Hawaiian background (PD2182/CB4856). Crossed with PD4106 (Hw with unc-54::GFP) subsequently. Pick mCherry+/GFP+ male to maintain.

## Sheet: Plasmids
pJA#	common name	antibiotic marker	backbone	r'aison d'etre	Cloning notes
74	unc-54 Cterminal gRNA	KAN	pRB1017	CRISPRing Cterminus of unc-54	AF-JA-167/168 cloned into pRB1017
78	skih-2 gRNA #1	KAN	pRB1017	CRISPRing skih-2	AF-JA-175/176 cloned into pRB1017
79	skih-2 gRNA #2	KAN	pRB1017	CRISPRing skih-2	AF-JA-177/178 cloned into pRB1017
60	r74.6 gRNA #1	KAN	pRB1017	CRISPR r74.6 locus in vicinity of Asp25	AF-JA-138/139 cloned into pRB1017
61	r74.6 gRNA #2	KAN	pRB1017	CRISPR r74.6 in vicinity of RGF motif	AF-JA-143/144 cloned into pRB1017
84	y54e10a.11 exon 5 gRNA	KAN	pRB1017	CRISPRing y54e10a.11	AF-JA-214/215 cloned into pRB1017
85	y54e10a.11 exon 6 gRNA	KAN	pRB1017	CRISPRing y54e10a.11	AF-JA-216/217 cloned into pRB1017
130	unc-54(nonstop) gRNA	KAN	pRB1017	cleavage in unc-54 recoded 3'UTR to insert back in stop codon. overlaps with BglII site, so only recoded cleaver	AF-JA-260/261 cloned into pRB1017
